# Supplementary material for: A novel zero-dimensional organic–inorganic hybrid ferroelectric material
Source: Royal Society of Chemistry journal article supplement (doi:10.1039/d3tc04674e), 2024-01-01
Supplement: d3tc04674e1.pdf [file d3tc04674e1.pdf]

## Supporting Information

### **A novel zero-dimensional organic-inorganic hybrid ferroelectric material**

Dong Li<sup>a</sup>, Xiaofan Sun<sup>a</sup>, Shulin Jiao<sup>a</sup>, Wentao Zhang<sup>a</sup>, Yanzhou Lu<sup>a</sup>, Min Zhao<sup>a</sup>, YiZhang Wu<sup>a</sup>, Hong-Ling Cai<sup>a\*</sup>, and Xiaoshan Wu<sup>a</sup>

<sup>a</sup>, National Laboratory of Solid State Microstructures, Collaborative Innovation Center of Advanced Microstructures, School of Physics, Nanjing University, Nanjing 210093, People's Republic of China.

Email: [hlcai@nju.edu.cn](mailto:hlcai@nju.edu.cn) (Prof. Hong-Ling Cai)

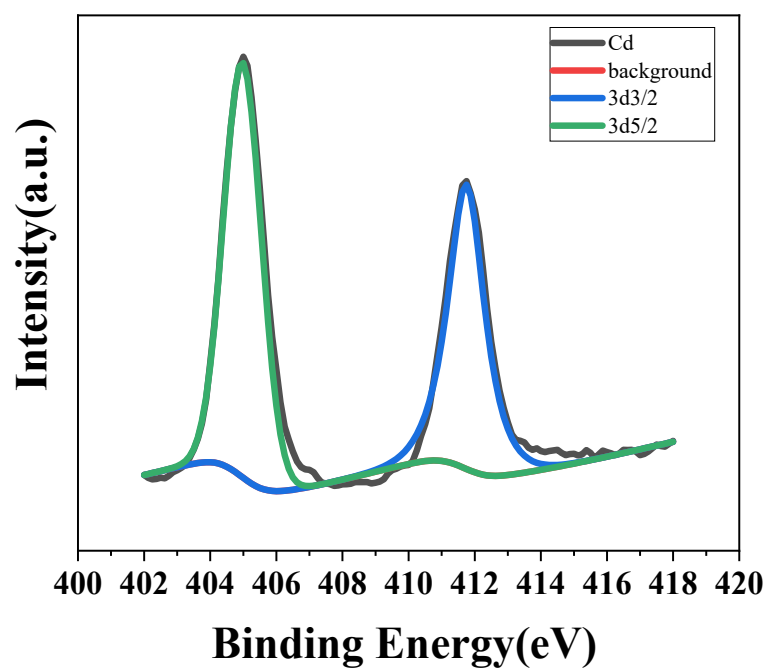

Figure S1. XPS spectrum of Cd for (2-Methylimidazole)<sub>2</sub>CdBr<sub>4</sub>

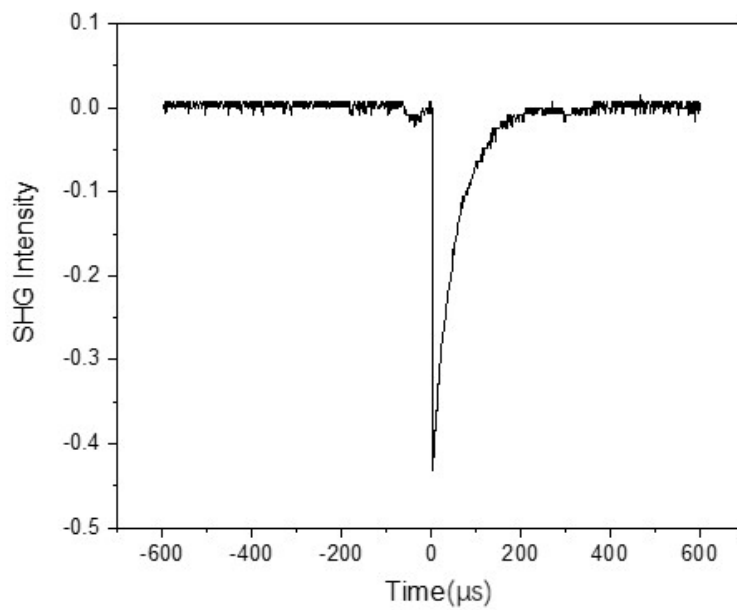

Figure S2. SHG signal of (2-Methylimidazole)<sub>2</sub>CdBr<sub>4</sub> at 287 K

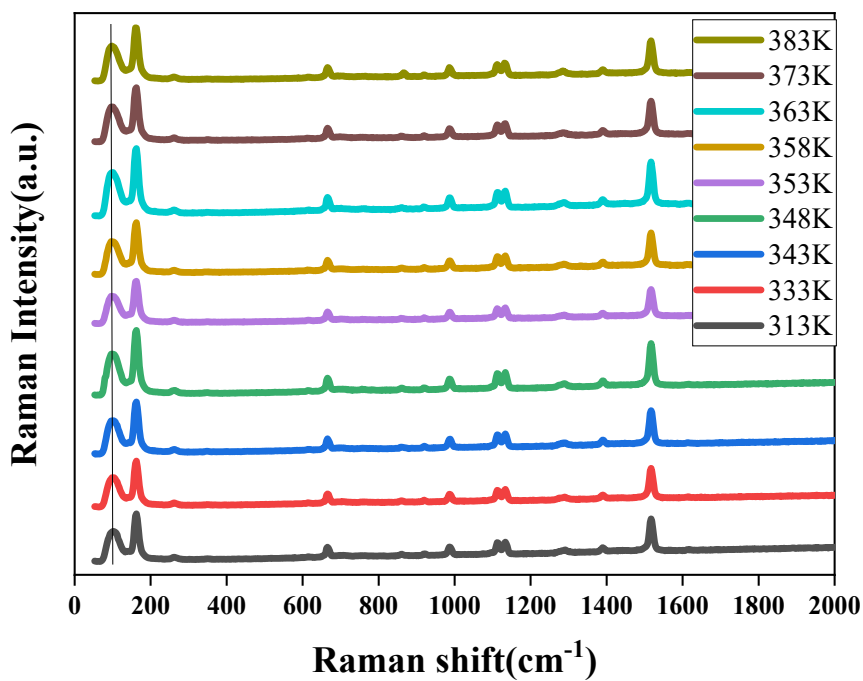

Figure S3. Raman diagram of (2-methylimidazole)<sub>2</sub>CdBr<sub>4</sub>.

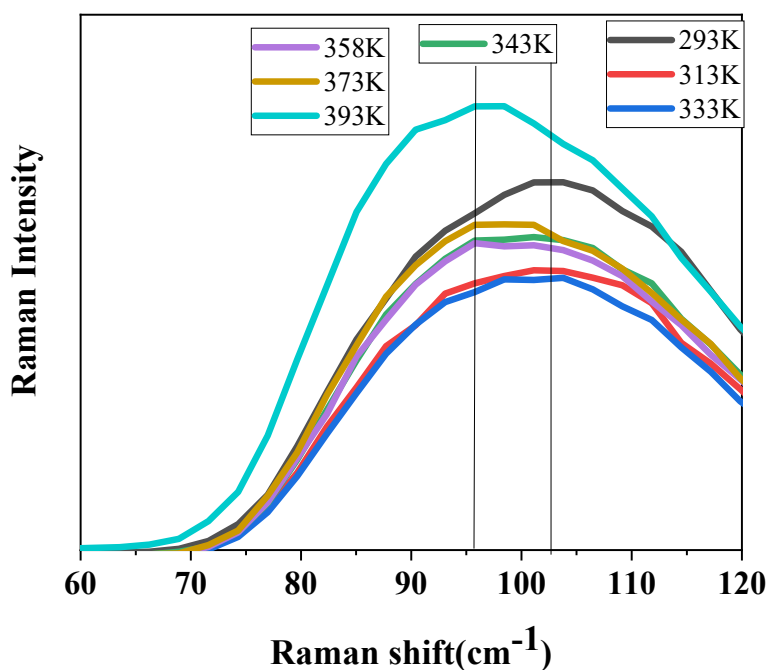

Figure S4. Raman diagram of (2-methylimidazole)<sub>2</sub>CdBr<sub>4</sub> at 60-120 wave numbers.

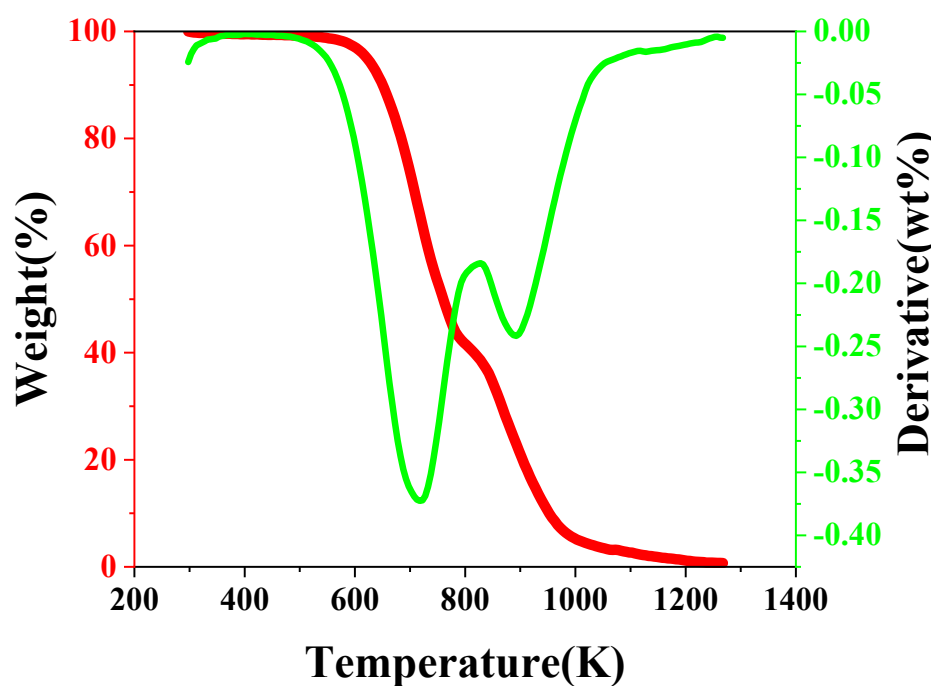

Figure S5. Thermal weight loss and the rate of change of  $(2\text{-Methylimidazole})_2\text{CdBr}_4$

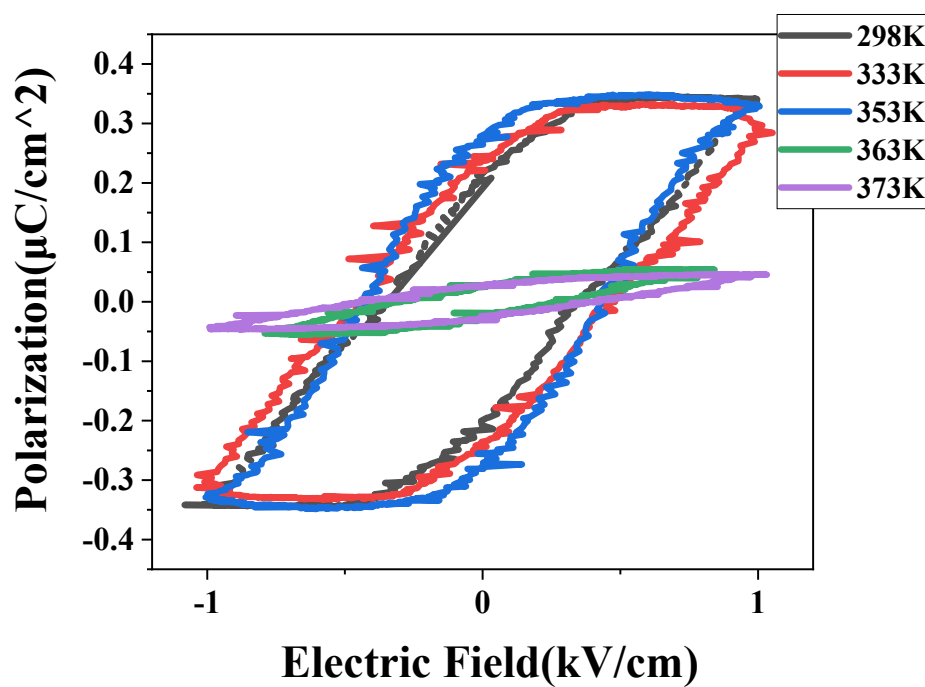

Figure S6. Hysteresis loops measured at different temperatures using the Sawyer-Tower method

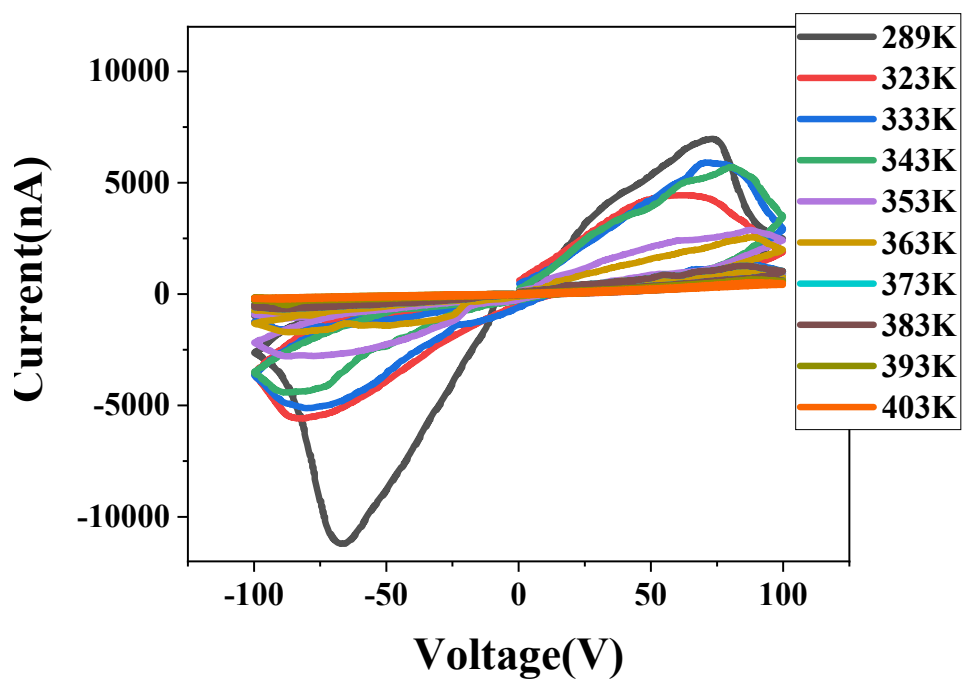

Figure S7. The current-voltage curve of a crystal is measured using the double-wave method at different temperatures.
